# Supplementary material
Source: PubMed Central journal article supplement (PMC8577331)
Supplement: mmc4.pdf [file mmc4.pdf]

## Consent for Acknowledgments

Manuscript Title: \_\_\_ Influence of past infection with SARS-CoV-2 on the response to the BNT162b2 mRNA vaccine in health care workers: kinetics and durability of the humoral immune response \_\_\_\_\_

Corresponding author: \_\_\_\_\_ Carlos de Cabo \_\_\_\_\_

Article type: \_\_\_ Article \_\_\_\_\_

### Person or entity being acknowledged to fill in items below:

I have seen a version of the manuscript to be submitted/published and I hereby give my consent for my name (or name of entity) to be included in the acknowledgement section in the above-named manuscript for consideration of publication in the *EBioMedicine*. I understand that this signed form will be submitted to the journal with the manuscript as evidence of my consent.

I understand that this manuscript may be published in the *EBioMedicine* and in products derived from the journals. As a result, I understand that the material may be seen by the general public. I understand that I may revoke consent at any time before publication, but once the information has been published revocation of the consent is no longer possible. I understand that I will derive no financial benefit from publication of this paper.

\_\_\_ Alexandra L. Salewski, MSc. \_\_\_\_\_  
Name of Person (print name) and/or Entity (print entity name and name of person signing )



\_\_\_\_\_  
Signature (or signature of the person giving consent on behalf of the person)

Albacete August 30th, 2021 \_\_\_\_\_  
Date

Only complete this section if you are not the person. What is your relationship? (The person giving consent should be a substitute decision maker or legal guardian or should hold power of attorney for the person or entity.)

Why is the person not able to give consent? (e.g., is the person a minor, incapacitated, or deceased?)
